# Supplementary material for: Development of a replication-competent lentivirus assay for dendritic cell-targeting lentiviral vectors
Source: PubMed Central journal article supplement — Mol Ther Methods Clin Dev. 2015 May 13;2:15017–. doi: 10.1038/mtm.2015.17 (PMC4445008; doi:10.1038/mtm.2015.17), 2015-05-13
Supplement: mtm201517-s1.pdf [file mtm201517-s1.pdf]

## Supplementary Figure S1

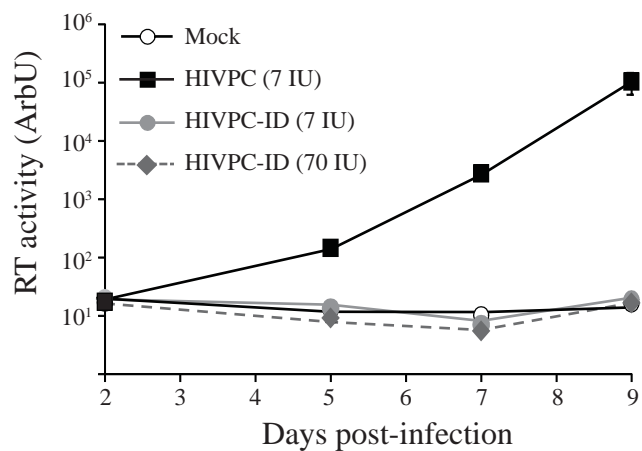

**Supplementary Figure S1.** Comparison of the replication of integration-competent (HIVPC) and -deficient (HIVPC-ID), attenuated HIV-1 viruses in C8166-45 cells. Cells were infected with infectious doses of HIVPC or HIVPC-ID or mock-infected. Infected cultures were then passaged at 2-3 day intervals over a total passage period of 9 days. Release of viral particles into supernatant fluid was measured by F-PERT analysis of cell culture medium sampled at each passage point (expressed in arbitrary units [ArbU]).

## Supplementary Figure S2

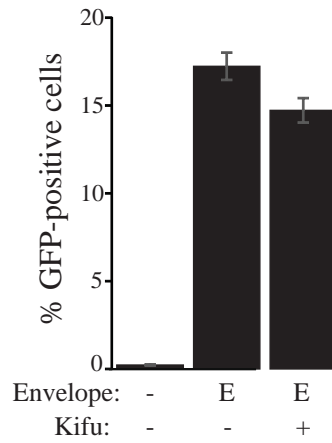

**Supplementary Figure S2.** Effect of kifunensine on final RCL assay format. GFP-expressing vector produced in 293F-DCSIGN cells and enveloped with E1001 (E) was normalized by F-PERT titer (vector particle number) and titered on 293F-DCSIGN cells. Where indicated, both the vector production cell type and the titration target cell type were cultured in the presence of kifunensine (1 ug/mL), modeling an rCL assay format that includes kifunensine.

## **Supplementary Materials and Methods**

The F-PERT assay was used to analyze the replication fitness of HIVPC and HIVPC-ID in C8166-45 cells (**Supplementary Fig. S1**). Input virus was normalized by F-PERT assay, with titers reported in relation to a virus standard of known infectious units (IU). Cells were inoculated in T-25 flasks. At 5 h post-infection, input inoculum was replaced with fresh medium; thereafter, cells were passaged every ~3 days, at a split ratio of 1:2-4. F-PERT analysis was performed on samples of culture supernatant fluid taken at each passage.
